# Supplementary material
Source: PubMed Central journal article supplement (PMC1317425)
Supplement: aem_71_12_8958__1.pdf [file aem_71_12_8958__1.pdf]

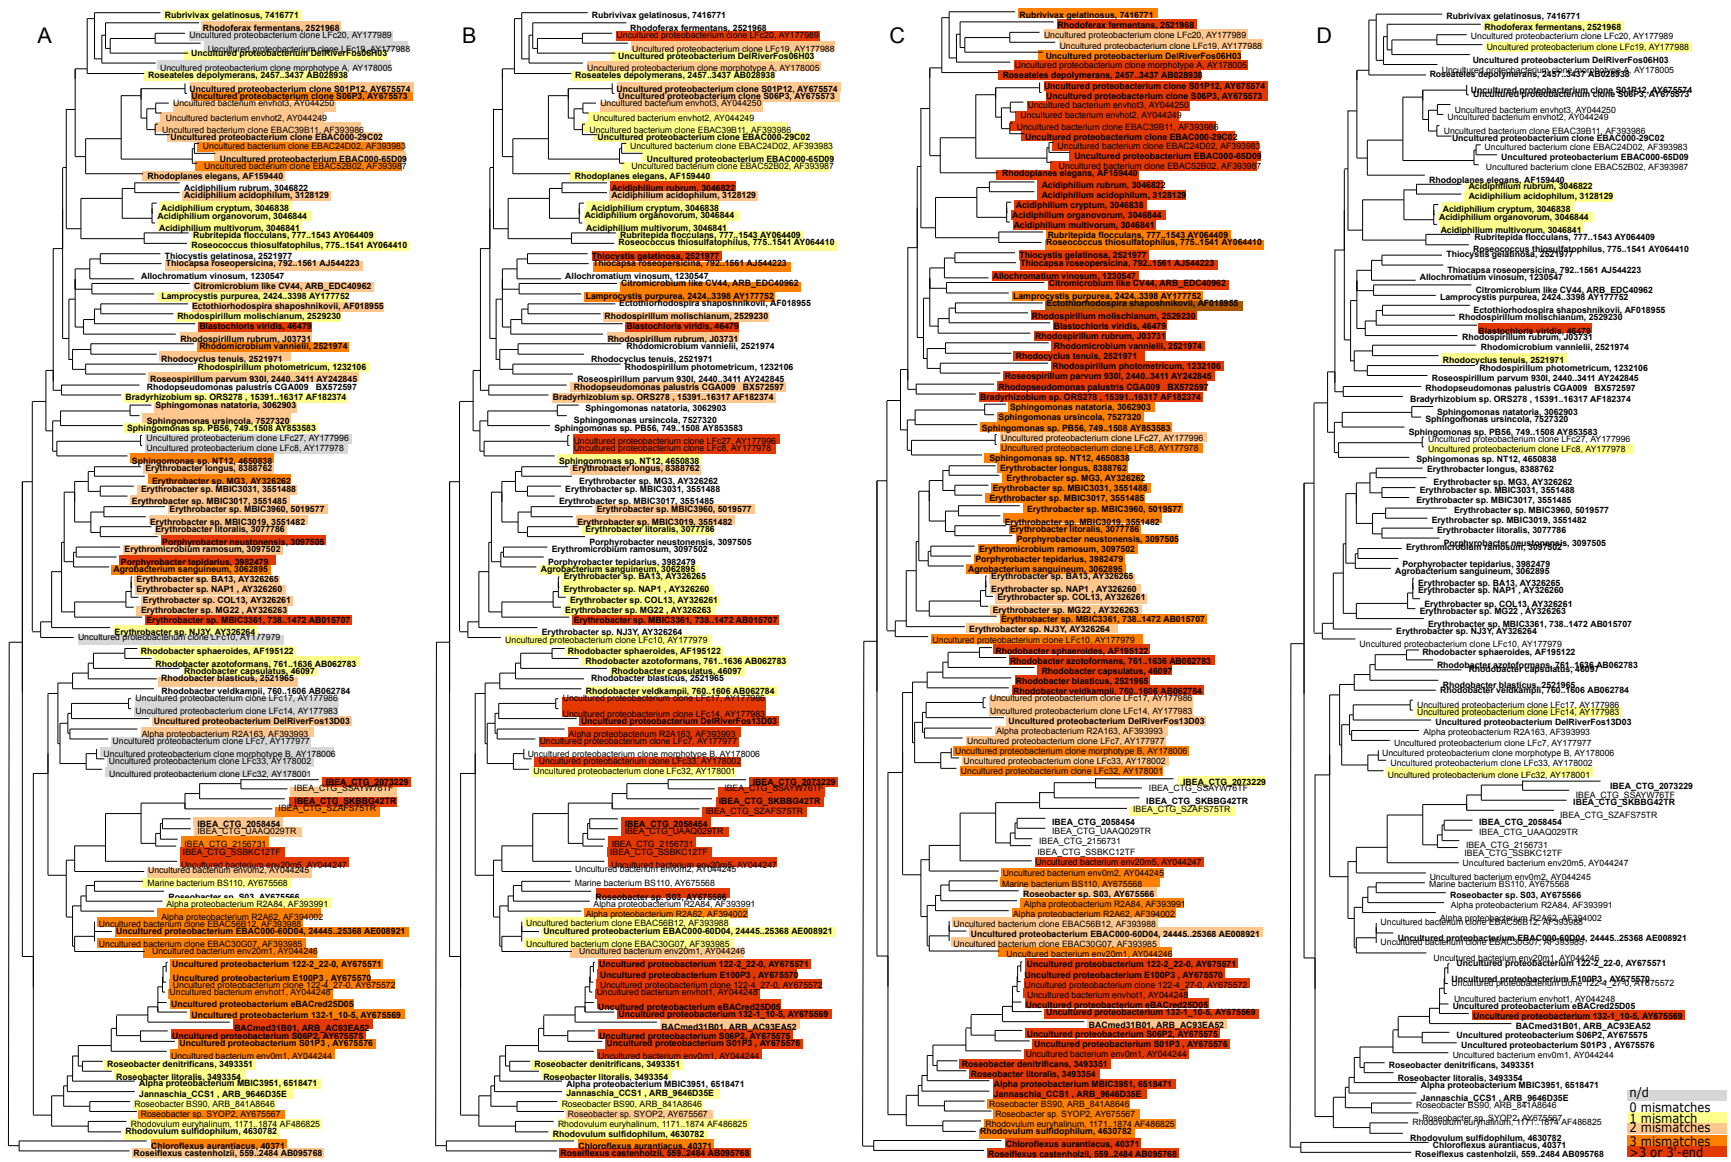

**Supplemental Figure.** The efficacy of some pufM forward primers, measured as the number of mismatches to various pufM sequences. The analysis was based on the same tree shown in Figure 1, but sequences not containing the analyzed region for all checked primers, were removed from the tree. A. pufM\_57F, a 16-bp-long primer (1). Sequences recovered using this primer and not containing the primer region and are marked as “not determined” (n/d, grey color). B. pufM\_fwd, a 18-bp-long primer (1, 3). C. forward primer used by Schwalbach & Fuhrman (15), a 17-bp-long primer. D. pufM\_uniF, a 26-bp-long primer (this study).
